# Supplementary material
Source: Copernicus journal article supplement (doi:10.5194/bg-23-4199-2026)
Supplement: Supplementary file [file bg-23-4199-2026-supplement-title-page.pdf › bg-23-4199-2026-supplement-title-page.pdf]

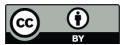

## *Supplement of*

# **Invertebrate communities on seasonal snow patches in the European lowlands are shaped by tree canopy-derived organic inputs**

**Dzmitry Lukashanets et al.**

*Correspondence to:* Dzmitry Lukashanets ([dzmitry.lukashanets@ku.lt](mailto:dzmitry.lukashanets@ku.lt))

- [bg-23-4199-2026-supplement-title-page.pdf](#)
- [Supplementary Table S1.xlsx](#)
- [Supplementary Table S2.xlsx](#)
- [Supplementary Table S3.xlsx](#)

The copyright of individual parts of the supplement might differ from the article licence.
